# Supplementary material for: Genetic Profiles Associated with Chemoresistance in Patient-Derived Xenograft Models of Ovarian Cancer
Source: PubMed Central journal article supplement — Cancer Res Treat. 2018 Nov 6;51(3):1117–27. doi: 10.4143/crt.2018.405 (PMC6639203; doi:10.4143/crt.2018.405), 2018-11-06
Supplement: crt-2018-405-suppl4.pdf [file crt-2018-405-suppl4.pdf]

**S4 Table.** A detailed reference description of the WES method: annotation pipeline

| No. | Tools  | Version | Option     | Reference (Web-site)                                                                                                      | Description                                                                  |
|-----|--------|---------|------------|---------------------------------------------------------------------------------------------------------------------------|------------------------------------------------------------------------------|
| 1   | snpeff | 4.2     | S.Table3-5 | <a href="https://www.ncbi.nlm.nih.gov/pmc/articles/PMC3679285/">https://www.ncbi.nlm.nih.gov/pmc/articles/PMC3679285/</a> | For annotating and predicting the effects of single nucleotide polymorphisms |

WES, whole exome-sequencing.
