# Supplementary material for: Genetic Profiles Associated with Chemoresistance in Patient-Derived Xenograft Models of Ovarian Cancer
Source: PubMed Central journal article supplement — Cancer Res Treat. 2018 Nov 6;51(3):1117–27. doi: 10.4143/crt.2018.405 (PMC6639203; doi:10.4143/crt.2018.405), 2018-11-06
Supplement: crt-2018-405-suppl5.pdf [file crt-2018-405-suppl5.pdf]

**S5 Table.** A detailed reference description of the WES method: DataBase information via snpeff software

| No   | Name                      | Version    | Reference (website)                                                                                                                                                                                       | Description                                                                                                                                                                                                                                                                                                                                                                                                                                                                     |
|------|---------------------------|------------|-----------------------------------------------------------------------------------------------------------------------------------------------------------------------------------------------------------|---------------------------------------------------------------------------------------------------------------------------------------------------------------------------------------------------------------------------------------------------------------------------------------------------------------------------------------------------------------------------------------------------------------------------------------------------------------------------------|
| 1    | ClinVar                   | 2015-05-07 | <a href="https://www.ncbi.nlm.nih.gov/pmc/articles/PMC3965032/">https://www.ncbi.nlm.nih.gov/pmc/articles/PMC3965032/</a>                                                                                 | Public archive of relationships among sequence variation and human phenotype                                                                                                                                                                                                                                                                                                                                                                                                    |
| 2    | COSMIC                    | v71        | <a href="http://cancer.sanger.ac.uk/cosmic">http://cancer.sanger.ac.uk/cosmic</a>                                                                                                                         | Catalogue of Somatic Mutations in Cancer                                                                                                                                                                                                                                                                                                                                                                                                                                        |
| 3    | dbNSFP                    | 2.9        | <a href="https://www.ncbi.nlm.nih.gov/pubmed/21520341">https://www.ncbi.nlm.nih.gov/pubmed/21520341</a>                                                                                                   | A lightweight database of human nonsynonymous SNPs and their functional predictions                                                                                                                                                                                                                                                                                                                                                                                             |
| 3-1  | dnSNP                     | 142        | <a href="http://nar.oxfordjournals.org/content/29/1/308.full">http://nar.oxfordjournals.org/content/29/1/308.full</a>                                                                                     | The NCBI database of genetic variation                                                                                                                                                                                                                                                                                                                                                                                                                                          |
| 3-2  | UniProt                   | 2013-06-30 | <a href="http://www.uniprot.org/">http://www.uniprot.org/</a>                                                                                                                                             | To provide the scientific community with a comprehensive, high-quality and freely accessible resource of protein sequence and functional information                                                                                                                                                                                                                                                                                                                            |
| 3-3  | InterPro                  | -          | <a href="https://www.ebi.ac.uk/interpro/">https://www.ebi.ac.uk/interpro/</a>                                                                                                                             | Protein sequence analysis and classification                                                                                                                                                                                                                                                                                                                                                                                                                                    |
| 3-4  | SIFT                      | -          | <a href="http://sift.bii.a-star.edu.sg/">http://sift.bii.a-star.edu.sg/</a>                                                                                                                               | Predict effects of nonsynonymous and missense variants                                                                                                                                                                                                                                                                                                                                                                                                                          |
| 3-5  | PolyPhen-2                | -          | <a href="http://genetics.bwh.harvard.edu/pph2/">http://genetics.bwh.harvard.edu/pph2/</a>                                                                                                                 | Prediction of functional effects of human nsSNPs (Polymorphism Phenotyping v2)                                                                                                                                                                                                                                                                                                                                                                                                  |
| 3-6  | LRT                       | -          | <a href="https://www.ncbi.nlm.nih.gov/pubmed/25117149">https://www.ncbi.nlm.nih.gov/pubmed/25117149</a>                                                                                                   | Likelihood ratio tests in rare variant detection for continuous phenotypes.                                                                                                                                                                                                                                                                                                                                                                                                     |
| 3-7  | MutationTaster            | -          | <a href="http://www.nature.com/nmeth/journal/v7/n8/full/nmeth0810-575.html">http://www.nature.com/nmeth/journal/v7/n8/full/nmeth0810-575.html</a>                                                         | MutationTaster evaluates disease-causing potential of sequence alterations                                                                                                                                                                                                                                                                                                                                                                                                      |
| 3-8  | GERP                      | -          | <a href="http://genome.cshlp.org/content/15/7/901.abstract">http://genome.cshlp.org/content/15/7/901.abstract</a>                                                                                         | GERP identifies constrained elements in multiple alignments by quantifying substitution deficits                                                                                                                                                                                                                                                                                                                                                                                |
| 3-9  | phastCons100way_vertbrate | 3.4.0      | <a href="https://bioconductor.org/packages/release/data/annotation/html/phastCons100way.UCSC.hg19.html">https://bioconductor.org/packages/release/data/annotation/html/phastCons100way.UCSC.hg19.html</a> | Store UCSC phastCons conservation scores for the human genome (hg19) calculated from multiple alignments with other 99 vertebrate species                                                                                                                                                                                                                                                                                                                                       |
| 3-10 | 1000g                     | phase3     | <a href="http://www.nature.com/nature/journal/v526/n7571/full/nature15394.html">http://www.nature.com/nature/journal/v526/n7571/full/nature15394.html</a>                                                 | The 1000 Genome Project aims to provide a deep characterization of human genome sequence variation as a foundation for investigating the relationship between genotype and phenotype                                                                                                                                                                                                                                                                                            |
| 4    | ESP6500                   | -          | <a href="https://esp.gs.washington.edu/drupal/">https://esp.gs.washington.edu/drupal/</a>                                                                                                                 | The goal of the NHLBI GO Exome Sequencing Project is to discover novel genes and mechanisms contributing to heart, lung and blood disorders by pioneering the application of next-generation sequencing of the protein coding regions of the human genome across diverse, richly-phenotyped populations and to share these datasets and findings with the scientific community to extend and enrich the diagnosis, management and treatment of heart, lung and blood disorders. |
| 5    | ExAC                      | release0.3 | <a href="http://exac.broadinstitute.org/">http://exac.broadinstitute.org/</a>                                                                                                                             | The Exome Aggregation Consortium is a coalition of investigators seeking to aggregate and harmonize exome sequencing data from a wide variety of large-scale sequencing projects, and to make summary data available for the wider scientific community                                                                                                                                                                                                                         |
