# Supplementary material for: Genetic Profiles Associated with Chemoresistance in Patient-Derived Xenograft Models of Ovarian Cancer
Source: PubMed Central journal article supplement — Cancer Res Treat. 2018 Nov 6;51(3):1117–27. doi: 10.4143/crt.2018.405 (PMC6639203; doi:10.4143/crt.2018.405), 2018-11-06
Supplement: crt-2018-405-suppl10.pdf [file crt-2018-405-suppl10.pdf]

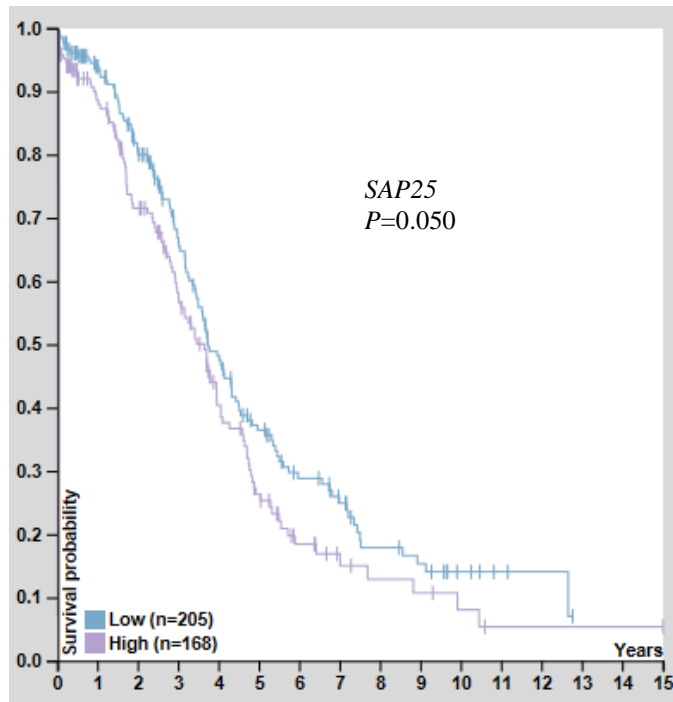

(Human Protein Atlas)

**S10 Fig.** Overall survival analysis for *SAP25* gene expression. Low expression of *SAP25* showed better overall survival than high expression (<https://www.proteinatlas.org/ENSG00000205307-SAP25/pathology/tissue/ovarian+cancer>).
