# Supplementary material for: Genetic Profiles Associated with Chemoresistance in Patient-Derived Xenograft Models of Ovarian Cancer
Source: PubMed Central journal article supplement — Cancer Res Treat. 2018 Nov 6;51(3):1117–27. doi: 10.4143/crt.2018.405 (PMC6639203; doi:10.4143/crt.2018.405), 2018-11-06
Supplement: crt-2018-405-suppl11.pdf [file crt-2018-405-suppl11.pdf]

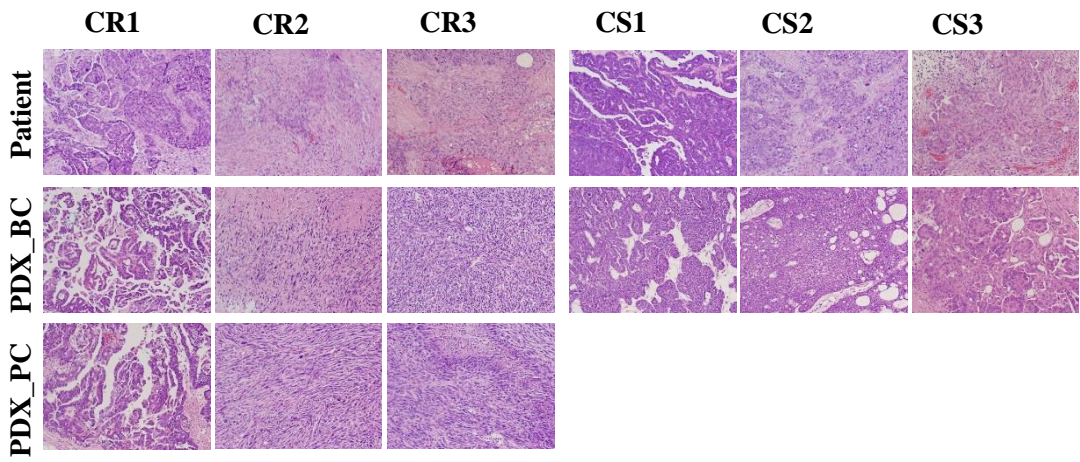

**S11 Fig.** H&E staining of patient tumors, corresponding patient-derived xenografts (PDXs), and PDXs post-chemotherapy ( $\times 200$ ).
